# Supplementary material for: Reference Datasets for Studies in a Replicate Design Intended for Average Bioequivalence with Expanding Limits
Source: Springer Nature journal article supplement (doi:10.1208/s12248-020-0427-6), 2020-02-07
Supplement: 12248_2020_427_MOESM1_ESM.docx [file 12248_2020_427_MOESM1_ESM.docx]

**Reference Datasets for Studies in a Replicate Design intended
for Average Bioequivalence with Expanding Limits**

***Supplementary Material***

Helmut Schütz,1 Detlew Labes,2 Michael Tomashevskiy,3 Mario González-de la Parra,4 Anastasia Shitova,5 and Anders Fuglsang6

1 BEBAC, Neubaugasse 36/11, 1070 Vienna, Austria
e-mail: helmut.schuetz@bebac.at, tel: +43 1 2311746
[0000-0002-1167-7880](https://orcid.org/0000-0002-1167-7880)

2 13055 Berlin, Germany
[0000-0003-2169-426X](https://orcid.org/0000-0003-2169-426X)

3 Saint Petersburg 191119, Russian Federation

4 Mexico City, Mexico
[0000-0003-1349-8955](https://orcid.org/0000-0003-1349-8955)

5 Yaroslavl 150045, Russian Federation
[0000-0003-3546-7316](https://orcid.org/0000-0003-3546-7316)

6 6100 Haderslev, Denmark

**Content**

[1 SAS 2](#_Toc28850504)

[2 replicateBE 3](#_Toc28850505)

[2.1 Installation Qualiﬁcation (IQ) 3](#_Toc28850506)

[2.2 Evaluation of all reference datasets and export to Excel 4](#_Toc28850507)

[3 Phoenix WinNonlin 6](#_Toc28850508)

[4 STATISTICA 7](#_Toc28850509)

[5 SPSS 9](#_Toc28850510)

[6 Stata 10](#_Toc28850511)

[7 JMP 10](#_Toc28850512)

[Appendix 12](#_Toc28850513)

[A note on log-transformations 12](#_Toc28850514)

[A note on approximate degrees of freedom 12](#_Toc28850515)

[Simulations 12](#_Toc28850516)

[R-script 15](#_Toc28850517)

**Typesetting convention**

Input and code : **typewriter**
Commands, ﬁles, output : monospaced

# SAS

Export the reference datasets from the Excel ﬁle rds.xls to comma-delimited text-ﬁles (variable separator comma, decimal separator period, ﬁle extension csv). Import a dataset (adjust the path and ﬁlename) in the code.

**PROC IMPORT OUT= PKdata**

**DATAFILE= "C:\Users\User\Documents\Datasets\DS01.csv"**

**DBMS=DLM REPLACE;**

**delimiter=",";**

**RUN;**

Perform loge-transformation.

**Data PKdata;**

**set PKdata;**

**logPK=log(PK);**

**RUN;**

Estimate *CVwR*.

**title1 'Variability of R evaluation - Q&A SAS code';**

**data PKdata_Ronly;**

**set PKdata;**

**where treatment="R";**

**RUN;**

**ODS output OverallANOVA = _anovaR;**

**ODS exclude FitStatistics;**

**Proc GLM data=PKdata_Ronly;**

**class subject period sequence;**

**model logPK = sequence subject(sequence) period;**

**RUN;**

**quit;**

**Data _anovaR;**

**set _anovaR;**

**where source='Error';**

**source = 'Error RR Q&A';**

**CVw = 100*sqrt(exp(MS)-1);**

**RUN;**

**Data sum;**

**merge _est _anovaR;**

**by dependent;**

**RUN;**

**title1 'CVwR (%) - Q&A SAS code';**

**Proc print data=_anovaR noobs label;**

**var source df ms CVw;**

**RUN;**

Method A.

**title1 Method A;**

**title2 T vs. R evaluation - GLM;**

**ODS output estimates = _est;**

**ODS exclude FitStatistics;**

**Proc GLM data=PKdata;**

**class treatment subject period sequence;**

**model logPK = sequence subject(sequence) period treatment / CLPARM alpha=0.1;**

**estimate 'T-R' treatment -1 1;**

**RUN;**

**quit;**

**Data _est;**

**set _est;**

*** CI in percent rounded to 2 decimals;**

**pe=round(100*exp(estimate), 0.01);**

**lower=round(100*exp(lowerCL), 0.01);**

**upper=round(100*exp(upperCL), 0.01);**

**halfwidth=upperCL-estimate;**

**RUN;**

**title2 'Method A. T vs. R evaluation - 90% CI';**

**Proc Print data=_est noobs label;**

**var pe lower upper halfwidth;**

**label pe='pe (%)' lower='lower cl(%)' upper='upper cl(%)';**

**run;**

Method B.

**title1 Method B;**

**title2 T vs. R evaluation - MIXED;**

**ODS output estimates = _est;**

**Proc MIXED data=PKdata;**

**class treatment period subject sequence;**

**model logPK = sequence period treatment;**

**random subject(sequence);**

**estimate "test-ref" treatment -1 1 / CL alpha=0.10;**

**RUN;**

**quit;**

**Data _est;**

**set _est;**

*** CI in percent rounded to 2 decimals;**

**pe=round(100*exp(estimate), 0.01);**

**lower=round(100*exp(lowerCL), 0.01);**

**upper=round(100*exp(upperCL), 0.01);**

**halfwidth=upperCL-estimate;**

**RUN;**

**title2 'Method B. T vs. R evaluation - 90% CI';**

**Proc Print data=_est noobs label;**

**var pe lower upper halfwidth;**

**label pe='pe (%)' lower='lower cl(%)' upper='upper cl(%)';**

**RUN;**

# replicateBE

## Installation Qualiﬁcation (IQ)

Use the R-script script provided in the Appendix page 15 and followings.

- In the R-console: File → Source R code… → navigate to the folder containing the script and open it.
- In RStudio: Code → Source File… → navigate to the folder containing the script and open it.

The script compares results obtained in the user’s computational environment with ones obtained by CRAN’s installations (32-/64-bit Windows, 32-/64-bit Linux [Debian and Fedora distributions], 32-bit Solaris).

Part of the output (results of tests of the highly imbalanced and incomplete rds29).

ok 29 ABE (90% CI, PE) of rds29

ok 59 method.A (CVwR, EL, 90% CI, PE) of rds29

ok 89 method.B (CVwR, EL, 90% CI, PE) of rds29

ok 91 method.B (Satterthwaite DF, CVwR, EL, 90% CI, PE) of rds29

ok 93 method.B (Kenward-Roger DF, CVwR, EL, 90% CI, PE) of rds29

90 tests performed: ABE(), method.A(), method.B() on each of the 30 datasets.

Additional four tests: Degrees of freedom approximated for incomplete data.

method.B(option = 1) tested on rds29 and rds30 (Satterthwaite).

method.B(option = 3) tested on rds29 and rds30 (Kenward-Roger).

ok: Local results differ less than 0.0000005 (i.e., beyond the 7th significant

digit) from CRAN’s installations on all operating systems (32 and 64 bit).

Details at https://cran.r-project.org/web/checks/check_results_replicateBE.html

If all tests are ok, the package passed Installation Qualification (IQ).

In parentheses the tested values are speciﬁed (*e.g.*, for the function **method.A()** the *CVwR*, the expanded lim­its, the 90% conﬁdence interval, and the point estimate).

If a test fails (artiﬁcial error of *CVwR* in rds01 evaluated by **method.B()** introduced):

not ok 61 method.B (CVwR, EL, 90% CI, PE) of rds01

x[, c(12, 15:19)] not equivalent to c(46.96434, 71.22698, 140.3962, 107.1707, 124.9725, 115.7298).

Component 1: Mean relative difference: 6.99344485341e-07

In such a case the package did not pass IQ in the user’s computational environment (hardware, operating system, R-release) and *must not* be used.

## Evaluation of all reference datasets and export to Excel

Use the following script. By default the ﬁle[[1]](#footnote-1) will be written to the user’s home directory. If desired, edit the path variable in the second line and uncomment it (remove the leading hash). Single slashes have to be used (all operating systems), except on Windows, where – alternatively – double backslashes can be used.

**#########################################################################**

**# Perform tests on all reference datasets: # ABE(), method.A(), #**

**# method.B(option=2) dfs like in Q&A, method.B(option=1) Satterthwaite, #**

**# method.B(option=3) Kenward-Roger and write in full precision to an #**

**# Excel workbook. #**

**#########################################################################**

**path <- getwd()**

**#path <- "C:/folder/subfolder/"**

**packages <- c("replicateBE", "xlsx", "xlsxjars")**

**inst <- packages %in% installed.packages()**

**if (length(packages[!inst]) > 0) install.packages(packages[!inst])**

**library(replicateBE)**

**library(xlsx)**

**xlsx.writeMultipleData <- function (file, ...) {**

**objects <- list(...)**

**fargs <- as.list(match.call(expand.dots=TRUE))**

**objnames <- as.character(fargs)[-c(1, 2)]**

**nobjects <- length(objects)**

**for (i in 1:nobjects) {**

**if (i == 1) {**

**write.xlsx(objects[[i]], file, sheetName=objnames[i],**

**row.names=FALSE, showNA=FALSE)**

**} else {**

**write.xlsx(objects[[i]], file, sheetName=objnames[i],**

**row.names=FALSE, append=TRUE, showNA=FALSE)**

**}**

**}**

**}**

**file <- paste0("replicateBE",**

**chartr(".", "-", packageVersion("replicateBE")),**

**"_results_.xlsx")**

**path <- gsub("\\", "/", path, fixed=TRUE)**

**if (substr(path, nchar(path), nchar(path)) != "/") {**

**path <- paste0(path, "/")**

**}**

**ds <- substr(grep("rds",**

**unname(unlist(data(package="replicateBE"))),**

**value=TRUE),**

**start=1, stop=5)**

**Unscaled <- data.frame(rds=sprintf("%02i", 1:length(ds)),**

**Design="", n=NA, nTT=NA, nRR=NA, df=NA,**

**stringsAsFactors=FALSE)**

**Method.B2 <- Method.B1 <- Method.A <- Unscaled**

**if (packageVersion("replicateBE") >= "1.0.8.9000") Method.B3 <- Method.B2**

**cols.from <- c(1, 3:5, 10, 12, 17:22)**

**cols.to <- c(2:13)**

**tests <- 4 + as.numeric(packageVersion("replicateBE") >= "1.0.8.9000")**

**total <- length(ds)*tests**

**i <- 0**

**st <- proc.time()[[3]]**

**pb <- txtProgressBar(min=0, max=1, char="\u2588", style=3)**

**for (j in seq_along(ds)) {**

**x <- ABE(print=FALSE, details=TRUE,**

**data=eval(parse(text=ds[j])))**

**i <- i + 1**

**setTxtProgressBar(pb, i/total)**

**Unscaled[j, c(2:11)] <- x[c(1, 3:5, 10, 12, 15:18)]**

**x <- method.A(print=FALSE, details=TRUE,**

**data=eval(parse(text=ds[j])))**

**i <- i + 1**

**setTxtProgressBar(pb, i/total)**

**Method.A[j, cols.to] <- x[cols.from]**

**x <- method.B(print=FALSE, details=TRUE, option=1,**

**data=eval(parse(text=ds[j])))**

**i <- i + 1**

**setTxtProgressBar(pb, i/total)**

**Method.B1[j, cols.to] <- x[cols.from]**

**Method.B1[["df method"]] <- "Satterthwaite"**

**x <- method.B(print=FALSE, details=TRUE, option=2,**

**data=eval(parse(text=ds[j])))**

**i <- i + 1**

**setTxtProgressBar(pb, i/total)**

**Method.B2[j, cols.to] <- x[cols.from]**

**Method.B2[["df method"]] <- "contain (GL)"**

**if (packageVersion("replicateBE") >= "1.0.8.9000") {**

**x <- method.B(print=FALSE, details=TRUE, option=3,**

**data=eval(parse(text=ds[j])))**

**i <- i + 1**

**setTxtProgressBar(pb, i/total)**

**Method.B3[j, cols.to] <- x[cols.from]**

**Method.B3[["df method"]] <- "Kenward-Roger"**

**}**

**}**

**close(pb)**

**et <- proc.time()[[3]]**

**if (packageVersion("replicateBE") < "1.0.8.9000") {**

**xlsx.writeMultipleData(paste0(path, file), Method.A,**

**Method.B1, Method.B2, Unscaled)**

**} else {**

**xlsx.writeMultipleData(paste0(path, file), Method.A,**

**Method.B1, Method.B2, Method.B3,**

**Unscaled)**

**}**

**cat("Execution took", signif(et-st, 3), "seconds\n")**

#
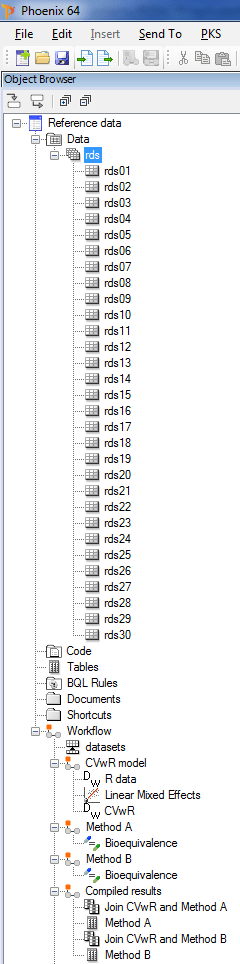
Phoenix WinNonlin

New Project, rename to Reference data → Import… → navigate to the loca­tion of the Excel workbook containing the reference datasets and open it. Keep all worksheets selected, keep the default blank cell as Missing value, except in rds15 and rds21, where NA and in rds27, where . has to be speciﬁed as Missing value.

- In the main workﬂow Append Worksheets, Number of Worksheets 28, Map **s**ubject, sequence, period, treatment, PK as Source Column in all and rename to datasets.[[2]](#footnote-2)
- Create a new Sub-Workﬂow and rename to CVwR model.
  - Add a Data Wizard and rename to R data.
    Map Output Data.Result of the worksheet datasets created before.
    Add a Built in Filter and Include treatment = R.
    Check the box ☑ Apply to entire row. ► Execute
    Send Final Results.Result to Linear Mixed Effects.
  - Sort by **S**ource, map subject, period, sequence as Classification and PK as Dependent. Specify Fixed Effects with
    sequence+subject(sequence)+period
    Dependent Variables Transformation Ln(x)**.** ► Execute
    Send Output Data.Final Variance Parameters to Data Wizard and rename to CVwR.
    Add a Custom Transformation
    New Column Name: CVwR
    Formula: 100*sqrt(exp(Estimate)-1). ► Execute
- Create a new sub-Workﬂow and rename to Method A.
  Add a Bioequivalence object. Sort by Source, map subject → Subject, sequence → Sequence, period → Period, treatment → Formulation, PK → Dependent. Specify the Fixed Effects of the model with sequence+subject(sequence)+period+treatment. Delete all variables in the tabs Random 1 and Repeated. In the tab General Options: Change Degrees of Freedom from the default Satterthwaite to Residual.
  ► Execute
- Copy the Sub-Workﬂow Method A, paste into the main Workﬂow and re­name to Method B. Delete subject(sequence) from Fixed Effects and add to Random 1. Clear all other variables from the tabs Random 1 and Repeated. Set Type to Variance Components. ► Execute
- Create a new Sub-Workﬂow and rename to Complied results.
  Add a Join Worksheets object, rename to CVwR and Method A:
  Worksheet 1: CVwR.Result, sort by Source, map CVwR as Source Column.
  Worksheet 2: Method A.Bioequivalence.Average Bioequivalence, sort by Source, map
  Ratio_%Ref_, CI_90_Lower, and CI_90_Upper as Source Column. ► Execute
  - Send Result to **E**xport.
    Select: Excel 97-2003 Workbook (*.xls) or Excel Workbook (*.xlsx).
    Select a folder, change the name from Result to Phoenix.Method.A and save.
  - Additionally/alternatively send Result to Table, rename to Method A. Map Source to Row ID and all other variables to Data.
    In Options: Precision/Alignment set Numeric Precision | Precision Method:
    DecimalPlaces and Value: 2, Data Alignment:Right. ► Execute
    Send Result.Tables.Table to Export.
    Select a folder, change the name from Table to Phoenix.Method.A and save.
  - Proceed similarly for Method B.

The user can execute this project every time the computational environment changes (new hardware, updated operating system, new release of Phoenix WinNonlin). Note that with every execution the size of the project-ﬁle increases due to the updated History of every object within. Hence, it is recommended to archive it and create a new project from scratch.

# STATISTICA

STATISTICA has a user-friendly interface so one may not need any programming skills to get the result. In order to estimate *CVwR* one has to select a subset with reference data only. To do that select Data, Subset..., choose Cases, tick Enable Selection Conditions and add the speciﬁc selected by expression case manu­ally: treatment=R, then click OK. Add new variable corresponding to log(PK) data. Сlick Statistics on the main bar, select ANOVA and choose Main effects ANOVA. Select dependent variable (lnPK) and categorical factors (subject, period, sequence). If one does not need the speciﬁc way of pre­sent­ing ANOVA table one can skip changing the default settings. Click All effects and copy MS from the Error line. The actual value of the *CVwR* may be computed by the formula:
CVwR = 100*(Exp(Error)-1)^(1/2).

Method A can be performed by following steps: Сlick Statistics on the main bar, select ANOVA and choose Main effects ANOVA. Select dependent variable (lnPK) and categorical factors (subject, period, sequence, treat­ment), then specify contrasts for treatment in the Comps tab: (-1; 1) for (R; T) correspondingly. Check the input settings (alpha-level) and click Compute to view the results in log-transformed form.

The described steps may also be made automatically with the help of the following macro. Note that it also con­tains the creation of the column with log-transformed PK data and sorting by treatment. The last was made in order to use (-1;1) contrasts whatever the initial data is: (R; T) or (T; R).

Method B can be evaluated by the following algorithm: choose Statistics, Variance Estimation and Preci­sion (VEPAC), select variables (dependent variable – lnPK, grouping variables: subjects, treatment, period, sequence). Set Estimation method – REML, Sum of squares – Type I; customize design (period, sequence, treatment – ﬁxed, subject(sequence) – random). Select Means Comparison, set alpha for conﬁdence interval: 0.90, select Pairwise comparisons, LS means and ﬁnally select variable (treatment).

Note that STATISTICA can misinterpret character values. Hence, one needs to pay attention for warnings dur­ing the import of the data. The mentioned macro does not deal with character values and empty lines, so one has to delete "NA", other character values and/or empty lines manually before starting the macro. This is espe­cially true for rds21 ("NA" in the PK column), rds24 (empty lines) and rds27 ("." in the PK column). Addi­ti­onal algorithms could be programmed to perform this task automatically

Estimate *CVwR*.

**Option Base 1**

**Sub Main**

**Dim AO As AnalysisOutput**

**Dim S As Spreadsheet**

**Set S = ActiveDataSet**

**Dim S2 As Spreadsheet**

**Set S2 = S.SubsetEx2("1-5", False, False, "treatment=""R""", "", "", "", True)**

**S2.Visible = True**

**S2.AddVariables "lnPK", 5, 1, scDouble, 8, -999999998, "General", "!~\FT1,,,\c0,=log(PK)"**

**S2.Recalculate 6**

**Set newanalysis = Analysis (scANOVA, S2)**

**Dim oStaDocs2 As StaDocuments**

**Dim G1 As STAMANOVA.MANOVAStartup**

**Set G1 = newanalysis.Dialog**

**newanalysis.Run**

**Dim G2 As STAGLM.GLMSpecifications**

**Set G2 = newanalysis.Dialog**

**G2.AnalysisSyntax = "MAN;" + vbCrLf + _**

**" DEPENDENT = lnPK;" + vbCrLf + _**

**" GROUPS = subject" + vbCrLf + _**

**" period" + vbCrLf + _**

**" sequence;" + vbCrLf + _**

**" DESIGN = subject + period + sequence;" + vbCrLf + _**

**""**

**newanalysis.Run**

**Dim G3 As STAGLM.GLMResults**

**Set G3 = newanalysis.Dialog**

**Set oStaDocs2 = G3.TestOfAllEffects**

**Set AO = newanalysis.RouteOutput(oStaDocs2)**

**AO.Visible = True**

**End Sub**

Method A.

**title1 Method A;**

**Option Base 1**

**Sub Main**

**Dim AO As AnalysisOutput**

**Dim S As Spreadsheet**

**Set S = ActiveDataSet**

**S.SortDataEx("4",Array(scSortAscending),Array(scSortByText),False,True)**

**S.AddVariables "lnPK", 5, 1, scDouble, 8, -999999998, "General", "!~\FT1,,,\c0,=log(PK)"**

**S.Recalculate 6**

**Dim newanalysis As Analysis**

**Set newanalysis = Analysis (scANOVA, S)**

**newanalysis.Run**

**Dim G As STAGLM.GLMSpecifications**

**Set G = newanalysis.Dialog**

**G.AnalysisSyntax = "MAN;" + vbCrLf + _**

**" DEPENDENT = ""lnPK"";" + vbCrLf + _**

**" GROUPS = ""subject"" "+ vbCrLf + _**

**" ""period"" " + vbCrLf + _**

**" ""sequence"" " + vbCrLf + _**

**" ""treatment"";" + vbCrLf + _**

**" DESIGN = ""subject"" + ""period"" + ""sequence"" + ""treatment"";" + vbCrLf + _**

**""**

**newanalysis.Run**

**Dim G1 As STAGLM.GLMResults**

**Set G1 = newanalysis.Dialog**

**G1.PForConfidenceLimits = 0.9**

**G1.EffectForMeanComparisons = """treatment"""**

**G1.EnterContrastsSeparatelyForEachFactor = True**

**G1.ContrastCoefficients = """treatment"" ( -1 1 ) "**

**Set AO = newanalysis.RouteOutput(G1.PlannedComparisonForLSMeans)**

**AO.Visible = True**

**Dim TextS As String**

**TextS = "Contrast Estimates (" & S & ")"**

**ActiveWorkbook.Item(TextS).Activate**

**End Sub**

Method B.

**Option Base 1**

**Sub Main**

**Dim AO As AnalysisOutput**

**Dim S As Spreadsheet**

**Set S = ActiveDataSet**

**S.AddVariables "lnPK", 5, 1, scDouble, 8, -999999998, "General", "!~\FT1,,,\c0,=log(PK)"**

**S.Recalculate 6**

**S.AddVariables "trt", 3, 1, scDouble, 8, -999999998, "General", "!~\FT1,,,\c0,=iif(treatment=""R"";2;1)"**

**S.Recalculate 4**

**Dim newanalysis As Analysis**

**Set newanalysis = Analysis (scVEPAC, S)**

**Dim G As STAVEPAC.VEPACStartup**

**Set G = newanalysis.Dialog**

**G.Variables = "7 | 1-4"**

**newanalysis.Run**

**Dim G1 As STAVEPAC.VEPACReview**

**Set G1 = newanalysis.Dialog**

**G1.ResponseVariables = "7"**

**G1.SelectedResponses = "1"**

**G1.DesignEffects = """period"" + ""sequence"" + ""trt"" + ""subject""(""sequence"")"**

**G1.RandomEffects = """subject""(""sequence"")"**

**G1.TypeOfAnalysisMethod = scVEPACRestrictedMaximumLikelihood**

**G1.TypeOfSumOfSquares = scVEPACSumOfSquaresTypeI**

**newanalysis.Dialog.CustomizeDesign**

**newanalysis.Run**

**Dim G2 As STAVEPAC.VEPACResults**

**Set G2 = newanalysis.Dialog**

**G2.SelectedResponses = "1"**

**G2.SelectedFixedEffect = "3"**

**G2.TypeOfResiduals = scVEPACRawResiduals**

**G2.LevelOfCollapsingVariances = 2**

**G2.AlphaForCI = 0.9**

**Set AO = newanalysis.RouteOutput(G2.PairwiseComparisonsOﬂSMeans)**

**AO.Visible = True**

**End Sub**

# SPSS

Using the menu system, import the Excel ﬁle (rds.xls).

***Transforming PK to logPK (not needed for rds01 and rds02)**

**COMPUTE logPK=LN(PK).**

**EXECUTE.**

***Selecting cases for the reference treatment “R”**

**USE ALL.**

**COMPUTE filter_$=(treatment = "R").**

**VARIABLE LABELS filter_$ 'treatment = 1 (FILTER)'.**

**VALUE LABELS filter_$ 0 'Not Selected' 1 'Selected'.**

**FORMATS filter_$ (f1.0).**

**FILTER BY filter_$.**

**EXECUTE.**

Estimate *CVwR*.

**UNIANOVA logPK BY sequence period subject**

**/RANDOM=subject**

**/METHOD=SSTYPE(3)**

**/INTERCEPT=INCLUDE**

**/CRITERIA=ALPHA(.1)**

**/DESIGN=sequence subject(sequence) period.**

***From the Test of Between-Subjects Effects obtain the MS(Error)labeled with the superscript c**

***Using all cases**

**FILTER OFF.**

**USE ALL.**

**EXECUTE.**

Method A.

**UNIANOVA logPK BY sequence period treatment subject**

**/RANDOM=subject**

**/METHOD=SSTYPE(3)**

**/INTERCEPT=INCLUDE**

**/EMMEANS=TABLES(treatment) COMPARE**

**/CRITERIA=ALPHA(.1)**

**/DESIGN=sequence subject(sequence) period treatment.**

Method B.

**MIXED logPK BY sequence period treatment subject**

**/CRITERIA=CIN(90) MXITER(100) MXSTEP(10) SCORING(1) SINGULAR(0.000000000001) HCONVERGE(0,**

**ABSOLUTE) LCONVERGE(0, ABSOLUTE) PCONVERGE(0.000001, ABSOLUTE)**

**/FIXED=sequence period treatment | SSTYPE(3)**

**/METHOD=REML**

**/RANDOM=subject within sequence**

**/EMMEANS=TABLES(treatment) COMPARE REFCAT(FIRST).**

# Stata

Using the menu system, import the Excel ﬁle (rds.xls).

***Converting character (string) variables to numeric categorical variables**

**rename sequence seq**

**rename treatment treat**

**encode seq,generate(sequence)**

**encode treat,generate(treatment)**

***Generating variable logPK (not needed for rds01 and rds02)**

**generate logPK = ln(PK)**

Estimate *CVwR*.

**set emptycells drop**

**anova logPK sequence/subject|sequence period if treatment == 1**

***Obtain the MS for the residual.**

Method A.

**set emptycells drop**

**anova logPK sequence/subject|sequence period treatment**

***Estimating mean difference (test-reference) and 90% CI**

**margins r.treatment,contrast(nowald effects) level(90)**

Method B.

**mixed logPK i.sequence i.period i.treatment||subject:,reml dfm(anova) level(90)**

**contrast r.treatment,small level(90) nowald**

# JMP

Using the menu system, import the Excel ﬁle (rds.xls). Before running the following script change the Modeling Type of the variables subject and period from continuous to nominal and select rows where treat­ment = R.

Estimate *CVwR*.

**Fit Model(**

**Y( Log( :PK ) ),**

**Effects( :sequence, :period ),**

**Random Effects( :subject[:sequence] & Random ),**

**NoBounds( 0 ),**

**Personality( Standard Least Squares ),**

**Method( EMS ),**

**Set Alpha Level( 0.1 ),**

**Emphasis( Effect Leverage ),**

**Run(**

**:PK << {Lack of Fit( 0 ), Plot Actual by Predicted( 1 ),**

**Plot Regression( 0 ), Plot Residual by Predicted( 1 ),**

**Plot Effect Leverage( 1 )}**

**)**

**);**

From the Analysis of Variance table obtain the Mean Square of the error term.

Before running the scripts for Methods A & B select all rows.

Method A.

**Fit Model(**

**Y( Log( :PK ) ),**

**Effects( :sequence, :period, :treatment ),**

**Random Effects( :subject[:sequence] & Random ),**

**NoBounds( 0 ),**

**Personality( Standard Least Squares ),**

**Method( EMS ),**

**Set Alpha Level( 0.1 ),**

**Emphasis( Effect Leverage ),**

**Run(**

**:PK << {Lack of Fit( 0 ), Plot Actual by Predicted( 1 ),**

**Plot Regression( 0 ), Plot Residual by Predicted( 1 ),**

**Plot Effect Leverage( 1 ), {:treatment <<**

**{LSMeans Student's t( 0.1, Detailed Comparisons( 1 ) )}}}**

**)**

**);**

From the Comparing T with R table obtain the 90% CI.

Method B.

**Fit Model(**

**Y( Log( :PK ) ),**

**Effects( :sequence, :period, :treatment ),**

**Random Effects( :subject[:sequence] & Random ),**

**Personality( Standard Least Squares ),**

**Method( REML ),**

**Set Alpha Level( 0.1 ),**

**Emphasis( Effect Leverage ),**

**Run(**

**:PK << {Analysis of Variance( 0 ), Lack of Fit( 0 ),**

**Plot Actual by Predicted( 1 ), Plot Regression( 0 ),**

**Plot Residual by Predicted( 1 ), Plot Effect Leverage( 1 ), {:treatment <<**

**{LSMeans Student's t( 0.1, Detailed Comparisons( 1 ) )}}}**

**)**

**);**

From the Comparing T with R table obtain the 90% CI.

# Appendix

## A note on log-transformations

The EMA’s examples contain only loge-transformed data (column logDATA) which are also employed by the original SAS-code. This is rather unusual because results of NCA are generally in the original (raw, untrans­formed) domain. However, the outcome differs in the 7th signiﬁcant digit at most, which is – due to round­ing – not relevant in practice.

**Table I.** Results with high numeric accuracy and rounded.

| dataset | column | *CVwR* | | *L*, *U* | | 90% conﬁdence interval | | | |
| --- | --- | --- | --- | --- | --- | --- | --- | --- | --- |
| p1 | p2 | p1 | | p2 | |
| rds01 | PK | 46.9643072 | 46.96 | 71.226977 | 140.396244 | 107.105665 | 124.894806 | 107.11 | 124.89 |
|  | logPK | 46.9643132 | 46.96 | 71.226974 | 140.396249 | 107.105671 | 124.894813 | 107.11 | 124.89 |
| rds01 | PK | 11.1707612 | 11.17 | 80.000000 | 125.000000 | 97.315547 | 107.464920 | 97.32 | 107.46 |
|  | logPK | 11.1707568 | 11.17 | 80.000000 | 125.000000 | 97.315540 | 107.464907 | 97.32 | 107.46 |

*CVwR* Coefﬁcient of variation of the reference used for expanding the limits

p1 High numeric accuracy

p2 Rounded to two decimal places

*L*, *U* Lower and upper limit of the acceptance range

## A note on approximate degrees of freedom

Some of the software packages provide not only approximations of degrees of freedom but setups within the method, where the residual variance is also modiﬁed. F.i. the Kenward-Roger approximation in SAS’ default setup (SCORING=0), Stata (OIM), and JMP compute Satterthwaite-type degrees of freedom [*sic*] and employ the *observed* information matrix. Only if the *expected* information matrix is requested (SCORING=1), the origi­nal Kenward-Roger degrees of freedom are used (like in the R-package replicateBE and by the default setup EIM in Stata). However, as shown by the small imbalanced and incomplete reference dataset rds29 the im­pact on the conﬁdence interval is practically negligible (Table II). The rank order of the width of the conﬁ­dence intervals in full numeric precision is: Satterthwaite (expected), Satterthwaite (observed), Kenward-Roger (expected), Kenward-Roger (observed).

**Table II.** Approximate degrees of freedom, methods, estimated 90% conﬁdence interval.

| software | option / module | method for approximation | | information matrix | setup | *df* | 90% CI | |
| --- | --- | --- | --- | --- | --- | --- | --- | --- |
| SAS | Proc MIXED | DDFM = | SATTERTHWAITE | observed | ☑ | 24.8647 | 88.43 | 121.59 |
|  |  | DDFM = | SATTERTHWAITE | expected | ☒ | 25.1597 | 88.44 | 121.58 |
|  |  | DDFM = | KENWARDROGER | observed | ☑ | 24.8647 | 88.42 | 121.60 |
|  |  | DDFM = | KENWARDROGER | expected | ☒ | 25.1597 | 88.43 | 121.60 |
| replicateBE | method.B() | option = 1 | Satterthwaite | expected | ☐ | 24.8647 | 88.43 | 121.59 |
|  |  | option = 3 | Kenward-Roger | expected | ☐ | 25.1596 | 88.43 | 121.60 |
| Phoenix WinNonlin | Bioequivalence | df | Satterthwaite | expected | ☐ | 24.8647 | 88.43 | 121.59 |
| Stata | mixed | dfm = | Satterthwaite | expected | ☐ | 24.8647 | 88.43 | 121.59 |
|  |  | dfm = | Kenward-Roger (OIM) | observed | ☒ | 24.8647 | 88.42 | 121.60 |
|  |  | dfm = | Kenward-Roger (EIM) | expected | ☑ | 25.1596 | 88.43 | 121.60 |
| SPSS | MIXED |  | Satterthwaite | expected | ☐ | 24.8647 | 88.43 | 121.59 |
| JMP | Fit model (REML) |  | Kenward-Roger | observed | ☐ | 24.8647 | 88.42 | 121.60 |

*df* Degrees of freedom

☑ Default

☒ Alternative

☐ Only available

OIM Observed information matrix

EIM Expected information matrix

## Simulations

We simulated studies in 4-period full replicate designs to compare the operational characteristics of Method A and Method B (degrees of freedom according to the Q&A document, Satterthwaite and Kenward-Roger ap­pro­ximation). Studies were simulated with *CVwR* of 30, 45, 60% and homogenicity as well as he­ter­ogenicity . Sample sizes were planned based on an assumed Test/Reference-ratio of 0.90 for 80% (Tables III and V) and 90% (Tables IV and VI) power.

Dropouts were simulated by a hazard function. The exponent *b* of the hazard function was set to 1 to simulate the moderate dropout rate (Tables III and IV) and to 2.5 for the high one (Tables V and VI).

**do <- function(a = 0.75, b = b, periods = 4, sequences = 2, n) {**

**do <- rep(0, periods)**

**do[2:periods] <- round(a * (2:periods) ^ b, 0)**

**eps <- c(0, round(runif(periods - 1), 0))**

**do <- as.integer(do + eps)**

**np <- n - do**

**np[np < 0] <- 0 # prevents negatives for small n**

**return(np)**

**}**

The resulting datasets were slightly imbalanced and moderately (Tables III and IV) or highly (Tables V and VI) incomplete. In each of the 18 scenarios 50,000 studies were simulated.

Models and their degrees of freedom were:

**############**

**# Method A #**

**############**

**modA <- lm(log(PK) ~ sequence + subject%in%sequence + period + treatment,**

**data = data)**

**df.a <- aov(modA)[[8]]**

**##########################**

**# Method B (acc. to Q&A) #**

**##########################**

**modB1 <- lme(log(PK) ~ sequence + period + treatment, random = ~1|subject,**

**na.action = na.omit, data = data)**

**b1 <- summary(modB1)**

**df.b1 <- b1$tTable["treatmentT", "DF"]**

**#############################################**

**# Method B (Sattertwaite and Kenward-Roger) #**

**#############################################**

**modB23 <- lmer(log(PK) ~ sequence + period + treatment + (1|subject),**

**na.action = na.omit, data = data)**

**#################################**

**# Satterthwaite's approximation #**

**#################################**

**b2 <- summary(modB23, ddf = "Satterthwaite")**

**df.b2 <- b2$coefﬁcients["treatmentT", "df"]**

**###############################**

**# Kenward-Roger approximation #**

**###############################**

**b3 <- summary(modB23, ddf = " Kenward-Roger")**

**df.b3 <- b3$coefﬁcients["treatmentT", "df"]**

In all scenarios on the average Method A was slightly more conservative (less studies passing ABEL) than any of the vari­ants of Method B. The Kenward-Roger approximation (B3) was slightly more conservative than the ap­proach recommended in the Q&A document (B1), whereas the Satterthwaite approximation (B2) in some sce­narios was more liberal than B1. In all scenarios the Kenward-Roger approximation (B3) was slightly more con­servative than the Satterthwaite approximation (B2). It should be noted that the chance of passing with the different methods differed only in the fourth decimal or less than 0.5%.

However, in *particular* datasets the conclusion might differ like in the reference dataset rds14, which passed ABEL by Method A (lower conﬁdence limit 69.99% > lower expanded limit 69.96%) but failed by all va­ri­ants of Method B (lower CL 69.21% < *L*).

**Table III.** Target power 80%, slightly imbalanced, low hazard function for the dropout rate
(incomplete data, lower chance to show BE).

|  |  |  |  |  |  |  |  |  |  |  | A | | B1 | | B2 | | B3 | | comparison | | | | |
| --- | --- | --- | --- | --- | --- | --- | --- | --- | --- | --- | --- | --- | --- | --- | --- | --- | --- | --- | --- | --- | --- | --- | --- |
| *s*²*wT*/*s*²*wR* | *CVwT* | *CVwR* | *N* | *power* | *n*1 | *n*2 | *p*1 | *p*2 | *p*3 | *p*4 | *df* | *p* | *df* | *p* | df | *p* | *df* | *p* | B2/B1 | | B3/B1 | | B3/B2 |
| 0.5 | 0.210 | 0.300 | 26 | 0.8138 | 13 | 12 | 25 | 22 | 20 | 17 | 55 | 0.6796 | 55 | 0.6817 | 56.418 | 0.6818 | 56.425 | 0.6814 | lib. | cons. | | cons. | |
| 1 | 0.300 | 0.300 | 34 | 0.8028 | 17 | 16 | 33 | 31 | 28 | 25 | 80 | 0.7401 | 80 | 0.7416 | 80.352 | 0.7417 | 80.406 | 0.7415 | lib. | cons. | | cons. | |
| 2 | 0.434 | 0.300 | 52 | 0.8023 | 26 | 25 | 51 | 49 | 46 | 43 | 134 | 0.7174 | 134 | 0.7182 | 134.518 | 0.7182 | 134.547 | 0.7181 | lib. | cons. | | cons. | |
| 0.5 | 0.311 | 0.450 | 22 | 0.8140 | 11 | 10 | 21 | 18 | 16 | 13 | 43 | 0.6405 | 43 | 0.6436 | 44.399 | 0.6437 | 44.421 | 0.6432 | lib. | cons. | | cons. | |
| 1 | 0.450 | 0.450 | 28 | 0.8112 | 14 | 13 | 27 | 24 | 22 | 19 | 61 | 0.7203 | 61 | 0.7236 | 62.388 | 0.7236 | 62.424 | 0.7234 | lib. | cons. | | cons. | |
| 2 | 0.668 | 0.450 | 40 | 0.8097 | 20 | 19 | 39 | 37 | 34 | 31 | 98 | 0.7117 | 98 | 0.7132 | 98.553 | 0.7132 | 98.582 | 0.7131 | lib. | cons. | | cons. | |
| 0.5 | 0.408 | 0.600 | 24 | 0.8015 | 12 | 11 | 23 | 21 | 18 | 15 | 50 | 0.6291 | 50 | 0.6317 | 50.491 | 0.6319 | 50.496 | 0.6313 | lib. | cons. | | cons. | |
| 1 | 0.600 | 0.600 | 32 | 0.8101 | 16 | 15 | 31 | 29 | 26 | 23 | 74 | 0.7268 | 74 | 0.7286 | 74.477 | 0.7287 | 74.502 | 0.7285 | lib. | cons. | | cons. | |
| 2 | 0.922 | 0.600 | 46 | 0.8030 | 23 | 22 | 45 | 42 | 40 | 37 | 115 | 0.7154 | 115 | 0.7178 | 116.646 | 0.7179 | 116.658 | 0.7178 | lib. | cons. | | cons. | |

**Table IV.** Target power 90%, slightly imbalanced, low hazard function for the dropout rate
(incomplete data, lower chance to show BE).

|  |  |  |  |  |  |  |  |  |  |  | A | | B1 | | B2 | | B3 | | comparison | | | | |
| --- | --- | --- | --- | --- | --- | --- | --- | --- | --- | --- | --- | --- | --- | --- | --- | --- | --- | --- | --- | --- | --- | --- | --- |
| *s*²*wT*/*s*²*wR* | *CVwT* | *CVwR* | *N* | *power* | *n*1 | *n*2 | *p*1 | *p*2 | *p*3 | *p*4 | *df* | *p* | *df* | *p* | df | *p* | *df* | *p* | B2/B1 | | B3/B1 | | B3/B2 |
| 0.5 | 0.210 | 0.300 | 36 | 0.9034 | 18 | 17 | 35 | 33 | 30 | 27 | 86 | 0.8052 | 86 | 0.8063 | 86.494 | 0.8064 | 86.498 | 0.8062 | lib. | cons. | | cons. | |
| 1 | 0.300 | 0.300 | 48 | 0.9002 | 24 | 23 | 47 | 44 | 42 | 39 | 121 | 0.8703 | 121 | 0.8713 | 122.387 | 0.8713 | 122.429 | 0.8712 | cons. | cons. | | cons. | |
| 2 | 0.434 | 0.300 | 74 | 0.9035 | 37 | 36 | 73 | 70 | 68 | 65 | 199 | 0.8409 | 199 | 0.8414 | 200.535 | 0.8415 | 200.556 | 0.8414 | lib. | equal | | cons. | |
| 0.5 | 0.311 | 0.450 | 30 | 0.9029 | 15 | 14 | 29 | 27 | 24 | 21 | 68 | 0.8040 | 68 | 0.8049 | 68.493 | 0.8051 | 68.497 | 0.8048 | lib. | cons. | | cons. | |
| 1 | 0.450 | 0.450 | 40 | 0.9125 | 20 | 19 | 39 | 37 | 34 | 31 | 98 | 0.8710 | 98 | 0.8723 | 98.441 | 0.8723 | 98.478 | 0.8722 | cons. | cons. | | cons. | |
| 2 | 0.668 | 0.450 | 56 | 0.9059 | 28 | 27 | 55 | 53 | 50 | 47 | 146 | 0.8460 | 146 | 0.8476 | 146.607 | 0.8476 | 146.617 | 0.8476 | equal | cons. | | cons. | |
| 0.5 | 0.408 | 0.600 | 34 | 0.9120 | 17 | 16 | 33 | 31 | 28 | 25 | 80 | 0.8165 | 80 | 0.8183 | 80.571 | 0.8184 | 80.542 | 0.8182 | lib. | cons. | | cons. | |
| 1 | 0.600 | 0.600 | 44 | 0.9099 | 22 | 21 | 43 | 40 | 38 | 35 | 109 | 0.8682 | 109 | 0.8693 | 110.535 | 0.8693 | 110.541 | 0.8692 | equal | cons. | | cons. | |
| 2 | 0.922 | 0.600 | 64 | 0.9058 | 32 | 31 | 63 | 61 | 58 | 55 | 170 | 0.8535 | 170 | 0.8545 | 170.729 | 0.8545 | 170.699 | 0.8545 | equal | cons. | | cons. | |

**Table V.** Target power 80%, slightly imbalanced, high hazard function for the dropout rate
(highly incomplete data, substantially lower chance to show BE).

|  |  |  |  |  |  |  |  |  |  |  | A | | B1 | | B2 | | B3 | | comparison | | | | |
| --- | --- | --- | --- | --- | --- | --- | --- | --- | --- | --- | --- | --- | --- | --- | --- | --- | --- | --- | --- | --- | --- | --- | --- |
| *s*²*wT*/*s*²*wR* | *CVwT* | *CVwR* | *N* | *power* | *n*1 | *n*2 | *p*1 | *p*2 | *p*3 | *p*4 | *df* | *p* | *df* | *p* | df | *p* | *df* | *p* | B2/B1 | | B3/B1 | | B3/B2 |
| 0.5 | 0.210 | 0.300 | 26 | 0.8138 | 13 | 12 | 25 | 20 | 13 | 1 | 30 | 0.5344 | 30 | 0.5405 | 32.018 | 0.5411 | 32.308 | 0.5400 | lib. | cons. | | cons. | |
| 1 | 0.300 | 0.300 | 34 | 0.8028 | 17 | 16 | 33 | 29 | 22 | 9 | 56 | 0.6413 | 56 | 0.6454 | 55.677 | 0.6457 | 56.466 | 0.6451 | lib. | cons. | | cons. | |
| 2 | 0.434 | 0.300 | 52 | 0.8023 | 26 | 25 | 51 | 47 | 40 | 27 | 110 | 0.6621 | 110 | 0.6647 | 110.158 | 0.6647 | 110.874 | 0.6646 | lib. | cons. | | cons. | |
| 0.5 | 0.311 | 0.450 | 22 | 0.8140 | 11 | 10 | 21 | 16 | 9 | 0 | 22 | 0.3534 | 22 | 0.3631 | 24.011 | 0.3644 | 24.317 | 0.3616 | lib. | cons. | | cons. | |
| 1 | 0.450 | 0.450 | 28 | 0.8112 | 14 | 13 | 27 | 22 | 15 | 2 | 35 | 0.4821 | 35 | 0.4889 | 37.508 | 0.4896 | 37.513 | 0.4885 | lib. | cons. | | cons. | |
| 2 | 0.668 | 0.450 | 40 | 0.8097 | 20 | 19 | 39 | 35 | 28 | 15 | 74 | 0.5935 | 74 | 0.5982 | 74.106 | 0.5984 | 74.774 | 0.5979 | lib. | cons. | | cons. | |
| 0.5 | 0.408 | 0.600 | 24 | 0.8015 | 12 | 11 | 23 | 19 | 12 | 0 | 28 | 0.3058 | 28 | 0.3148 | 28.108 | 0.3157 | 28.415 | 0.3137 | lib. | cons. | | cons. | |
| 1 | 0.600 | 0.600 | 32 | 0.8101 | 16 | 15 | 31 | 27 | 20 | 7 | 50 | 0.5317 | 50 | 0.5392 | 49.808 | 0.5396 | 50.495 | 0.5388 | lib. | cons. | | cons. | |
| 2 | 0.922 | 0.600 | 46 | 0.8030 | 23 | 22 | 45 | 40 | 33 | 20 | 89 | 0.6175 | 89 | 0.6205 | 92.35 | 0.6206 | 92.573 | 0.6202 | lib. | cons. | | cons. | |

*N*, *power* Estimated sample size, achievable power (no dropouts, complete data)

*n*1, *n*2 Eligible subjects in sequences 1 (TRTR) and 2 (RTRT)

*p*1 – *p*4 Eligible subjects in periods 1 – 4

A Evaluated by Method A

B1 Evaluated by Method B (acc. to the Q&A document)
B2 Evaluated by Method B (Satterthwaite’s approximation)

B3 Evaluated by Method B (Kenward-Roger approximation)

*df* Degrees of freedom

*p* Fraction of studies passing the mixed criterion (90% CI within expanded limits, PE within 80.00 – 125.00%)

lib. Liberal (more studies passing)

equal Same fraction of studies passing

cons. Conservative (less studies passing)

**Table VI.** Target power 90%, slightly imbalanced, high hazard function for the dropout rate
(highly incomplete data, substantially lower chance to show BE).

|  |  |  |  |  |  |  |  |  |  |  | A | | B1 | | B2 | | B3 | | comparison | | | | |
| --- | --- | --- | --- | --- | --- | --- | --- | --- | --- | --- | --- | --- | --- | --- | --- | --- | --- | --- | --- | --- | --- | --- | --- |
| *s*²*wT*/*s*²*wR* | *CVwT* | *CVwR* | *N* | *power* | *n*1 | *n*2 | *p*1 | *p*2 | *p*3 | *p*4 | *df* | *p* | *df* | *p* | df | *p* | *df* | *p* | B2/B1 | | B3/B1 | | B3/B2 |
| 0.5 | 0.210 | 0.300 | 36 | 0.9034 | 18 | 17 | 35 | 31 | 24 | 11 | 62 | 0.7248 | 62 | 0.7283 | 61.878 | 0.7286 | 62.668 | 0.7280 | lib. | cons. | | cons. | |
| 1 | 0.300 | 0.300 | 48 | 0.9002 | 24 | 23 | 47 | 42 | 35 | 22 | 95 | 0.8134 | 95 | 0.8160 | 97.872 | 0.8161 | 98.042 | 0.8159 | lib. | cons. | | cons. | |
| 2 | 0.434 | 0.300 | 74 | 0.9035 | 37 | 36 | 73 | 68 | 61 | 48 | 173 | 0.8099 | 173 | 0.8107 | 176.303 | 0.8107 | 176.275 | 0.8107 | equal | cons. | | cons. | |
| 0.5 | 0.311 | 0.450 | 30 | 0.9029 | 15 | 14 | 29 | 25 | 18 | 5 | 44 | 0.6278 | 44 | 0.6340 | 43.721 | 0.6344 | 44.502 | 0.6336 | lib. | cons. | | cons. | |
| 1 | 0.450 | 0.450 | 40 | 0.9125 | 20 | 19 | 39 | 35 | 28 | 15 | 74 | 0.7811 | 74 | 0.7829 | 73.903 | 0.7829 | 74.63 | 0.7827 | lib. | cons. | | cons. | |
| 2 | 0.668 | 0.450 | 56 | 0.9059 | 28 | 27 | 55 | 51 | 44 | 31 | 122 | 0.7896 | 122 | 0.7935 | 122.347 | 0.7935 | 122.991 | 0.7934 | lib. | cons. | | cons. | |
| 0.5 | 0.408 | 0.600 | 34 | 0.9120 | 17 | 16 | 33 | 29 | 22 | 9 | 56 | 0.6772 | 56 | 0.6830 | 55.959 | 0.6832 | 56.621 | 0.6825 | lib. | cons. | | cons. | |
| 1 | 0.600 | 0.600 | 44 | 0.9099 | 22 | 21 | 43 | 38 | 31 | 18 | 83 | 0.7840 | 83 | 0.7883 | 86.106 | 0.7884 | 86.65 | 0.7881 | lib. | cons. | | cons. | |
| 2 | 0.922 | 0.600 | 64 | 0.9058 | 32 | 31 | 63 | 59 | 52 | 39 | 146 | 0.8060 | 146 | 0.8077 | 146.619 | 0.8077 | 147.202 | 0.8076 | lib. | cons. | | cons. | |

*N*, *power* Estimated sample size, achievable power (no dropouts, complete data)

*n*1, *n*2 Eligible subjects in sequences 1 (TRTR) and 2 (RTRT)

*p*1 – *p*4 Eligible subjects in periods 1 – 4

A Evaluated by Method A

B1 Evaluated by Method B (acc. to the Q&A document)
B2 Evaluated by Method B (Satterthwaite’s approximation)

B3 Evaluated by Method B (Kenward-Roger approximation)

*df* Degrees of freedom

*p* Fraction of studies passing the mixed criterion (90% CI within expanded limits, PE within 80.00 – 125.00%)

lib. Liberal (more studies passing)

equal Same fraction of studies passing

cons. Conservative (less studies passing)

## R-script

Copy and save as IQ.R for the Installation Qualiﬁcation of package replicateBE to your preferred location.

**##############################**

**# Create source 'testthat.R' #**

**##############################**

**source.1 <- paste0(**

**"#########################",**

**"\n# Script for testthat() #",**

**"\n#########################",**

**"\n# ABE #",**

**"\n#######",**

**"\ntest_that('ABE (90% CI, PE) of rds01', {",**

**"\n x <- ABE(details=TRUE, print=FALSE, data=rds01)",**

**"\n expect_equivalent(as.numeric(x[15:17]), tolerance=5e-7,",**

**"\n expected=c(107.1057, 124.8948, 115.6587))})",**

**"\ntest_that('ABE (90% CI, PE) of rds02', {",**

**"\n x <- ABE(details=TRUE, print=FALSE, data=rds02)",**

**"\n expect_equivalent(as.numeric(x[15:17]), tolerance=5e-7,",**

**"\n expected=c(97.31555, 107.4649, 102.2644))})",**

**"\ntest_that('ABE (90% CI, PE) of rds03', {",**

**"\n x <- ABE(details=TRUE, print=FALSE, data=rds03)",**

**"\n expect_equivalent(as.numeric(x[15:17]), tolerance=5e-7,",**

**"\n expected=c(113.0492, 136.4254, 124.1885))})",**

**"\ntest_that('ABE (90% CI, PE) of rds04', {",**

**"\n x <- ABE(details=TRUE, print=FALSE, data=rds04)",**

**"\n expect_equivalent(as.numeric(x[15:17]), tolerance=5e-7,",**

**"\n expected=c(117.9016, 159.6893, 137.2138))})",**

**"\ntest_that('ABE (90% CI, PE) of rds05', {",**

**"\n x <- ABE(details=TRUE, print=FALSE, data=rds05)",**

**"\n expect_equivalent(as.numeric(x[15:17]), tolerance=5e-7,",**

**"\n expected=c(103.8242, 112.0357, 107.8518))})",**

**"\ntest_that('ABE (90% CI, PE) of rds06', {",**

**"\n x <- ABE(details=TRUE, print=FALSE, data=rds06)",**

**"\n expect_equivalent(as.numeric(x[15:17]), tolerance=5e-7,",**

**"\n expected=c(80.06738, 93.36574, 86.46127))})",**

**"\ntest_that('ABE (90% CI, PE) of rds07', {",**

**"\n x <- ABE(details=TRUE, print=FALSE, data=rds07)",**

**"\n expect_equivalent(as.numeric(x[15:17]), tolerance=5e-7,",**

**"\n expected=c(86.45598, 92.81029, 89.57681))})",**

**"\ntest_that('ABE (90% CI, PE) of rds08', {",**

**"\n x <- ABE(details=TRUE, print=FALSE, data=rds08)",**

**"\n expect_equivalent(as.numeric(x[15:17]), tolerance=5e-7,",**

**"\n expected=c(75.69153, 87.59971, 81.42823))})",**

**"\ntest_that('ABE (90% CI, PE) of rds09', {",**

**"\n x <- ABE(details=TRUE, print=FALSE, data=rds09)",**

**"\n expect_equivalent(as.numeric(x[15:17]), tolerance=5e-7,",**

**"\n expected=c(75.69153, 87.59971, 81.42823))})",**

**"\ntest_that('ABE (90% CI, PE) of rds10', {",**

**"\n x <- ABE(details=TRUE, print=FALSE, data=rds10)",**

**"\n expect_equivalent(as.numeric(x[15:17]), tolerance=5e-7,",**

**"\n expected=c(96.26997, 107.5861, 101.7709))})",**

**"\ntest_that('ABE (90% CI, PE) of rds11', {",**

**"\n x <- ABE(details=TRUE, print=FALSE, data=rds11)",**

**"\n expect_equivalent(as.numeric(x[15:17]), tolerance=5e-7,",**

**"\n expected=c(80.63656, 100.3801, 89.96836))})",**

**"\ntest_that('ABE (90% CI, PE) of rds12', {",**

**"\n x <- ABE(details=TRUE, print=FALSE, data=rds12)",**

**"\n expect_equivalent(as.numeric(x[15:17]), tolerance=5e-7,",**

**"\n expected=c(90.82107, 158.9575, 120.1528))})",**

**"\ntest_that('ABE (90% CI, PE) of rds13', {",**

**"\n x <- ABE(details=TRUE, print=FALSE, data=rds13)",**

**"\n expect_equivalent(as.numeric(x[15:17]), tolerance=5e-7,",**

**"\n expected=c(72.71128, 85.35728, 78.78094))})",**

**"\ntest_that('ABE (90% CI, PE) of rds14', {",**

**"\n x <- ABE(details=TRUE, print=FALSE, data=rds14)",**

**"\n expect_equivalent(as.numeric(x[15:17]), tolerance=5e-7,",**

**"\n expected=c(69.98855, 123.1679, 92.84581))})",**

**"\ntest_that('ABE (90% CI, PE) of rds15', {",**

**"\n x <- ABE(details=TRUE, print=FALSE, data=rds15)",**

**"\n expect_equivalent(as.numeric(x[15:17]), tolerance=5e-7,",**

**"\n expected=c(72.71128, 85.35728, 78.78094))})",**

**"\ntest_that('ABE (90% CI, PE) of rds16', {",**

**"\n x <- ABE(details=TRUE, print=FALSE, data=rds16)",**

**"\n expect_equivalent(as.numeric(x[15:17]), tolerance=5e-7,",**

**"\n expected=c(69.53983, 89.36796, 78.83294))})",**

**"\ntest_that('ABE (90% CI, PE) of rds17', {",**

**"\n x <- ABE(details=TRUE, print=FALSE, data=rds17)",**

**"\n expect_equivalent(as.numeric(x[15:17]), tolerance=5e-7,",**

**"\n expected=c(116.0171, 155.1944, 134.1835))})",**

**"\ntest_that('ABE (90% CI, PE) of rds18', {",**

**"\n x <- ABE(details=TRUE, print=FALSE, data=rds18)",**

**"\n expect_equivalent(as.numeric(x[15:17]), tolerance=5e-7,",**

**"\n expected=c(54.15838, 99.45727, 73.3924))})",**

**"\ntest_that('ABE (90% CI, PE) of rds19', {",**

**"\n x <- ABE(details=TRUE, print=FALSE, data=rds19)",**

**"\n expect_equivalent(as.numeric(x[15:17]), tolerance=5e-7,",**

**"\n expected=c(54.17604, 100.0003, 73.60448))})",**

**"\ntest_that('ABE (90% CI, PE) of rds20', {",**

**"\n x <- ABE(details=TRUE, print=FALSE, data=rds20)",**

**"\n expect_equivalent(as.numeric(x[15:17]), tolerance=5e-7,",**

**"\n expected=c(51.17198, 96.74928, 70.36229))})",**

**"\ntest_that('ABE (90% CI, PE) of rds21', {",**

**"\n x <- ABE(details=TRUE, print=FALSE, data=rds21)",**

**"\n expect_equivalent(as.numeric(x[15:17]), tolerance=5e-7,",**

**"\n expected=c(111.7245, 127.7421, 119.4652))})",**

**"\ntest_that('ABE (90% CI, PE) of rds22', {",**

**"\n x <- ABE(details=TRUE, print=FALSE, data=rds22)",**

**"\n expect_equivalent(as.numeric(x[15:17]), tolerance=5e-7,",**

**"\n expected=c(77.98481, 106.0858, 90.95646))})",**

**"\ntest_that('ABE (90% CI, PE) of rds23', {",**

**"\n x <- ABE(details=TRUE, print=FALSE, data=rds23)",**

**"\n expect_equivalent(as.numeric(x[15:17]), tolerance=5e-7,",**

**"\n expected=c(97.12989, 128.4137, 111.6817))})",**

**"\ntest_that('ABE (90% CI, PE) of rds24', {",**

**"\n x <- ABE(details=TRUE, print=FALSE, data=rds24)",**

**"\n expect_equivalent(as.numeric(x[15:17]), tolerance=5e-7,",**

**"\n expected=c(87.23787, 109.8533, 97.89466))})",**

**"\ntest_that('ABE (90% CI, PE) of rds25', {",**

**"\n x <- ABE(details=TRUE, print=FALSE, data=rds25)",**

**"\n expect_equivalent(as.numeric(x[15:17]), tolerance=5e-7,",**

**"\n expected=c(77.92805, 98.10162, 87.43493))})",**

**"\ntest_that('ABE (90% CI, PE) of rds26', {",**

**"\n x <- ABE(details=TRUE, print=FALSE, data=rds26)",**

**"\n expect_equivalent(as.numeric(x[15:17]), tolerance=5e-7,",**

**"\n expected=c(133.5157, 171.4202, 151.2854))})",**

**"\ntest_that('ABE (90% CI, PE) of rds27', {",**

**"\n x <- ABE(details=TRUE, print=FALSE, data=rds27)",**

**"\n expect_equivalent(as.numeric(x[15:17]), tolerance=5e-7,",**

**"\n expected=c(78.64846, 89.05791, 83.69151))})",**

**"\ntest_that('ABE (90% CI, PE) of rds28', {",**

**"\n x <- ABE(details=TRUE, print=FALSE, data=rds28)",**

**"\n expect_equivalent(as.numeric(x[15:17]), tolerance=5e-7,",**

**"\n expected=c(87.86358, 100.0704, 93.76858))})",**

**"\ntest_that('ABE (90% CI, PE) of rds29', {",**

**"\n x <- ABE(details=TRUE, print=FALSE, data=rds29)",**

**"\n expect_equivalent(as.numeric(x[15:17]), tolerance=5e-7,",**

**"\n expected=c(88.28064, 121.3064, 103.4843))})",**

**"\ntest_that('ABE (90% CI, PE) of rds30', {",**

**"\n x <- ABE(details=TRUE, print=FALSE, data=rds30)",**

**"\n expect_equivalent(as.numeric(x[15:17]), tolerance=5e-7,",**

**"\n expected=c(79.60345, 108.0298, 92.73371))})",**

**"\n###################",**

**"\n# ABEL (Method A) #",**

**"\n###################",**

**"\ntest_that('method.A (CVwR, EL, 90% CI, PE) of rds01', {",**

**"\n x <- method.A(details=TRUE, print=FALSE, data=rds01)",**

**"\n expect_equivalent(as.numeric(x[, c(12, 15:19)]), tolerance=5e-7,",**

**"\n expected=c(46.96431, 71.22698, 140.3962,",**

**"\n 107.1057, 124.8948, 115.6587))})",**

**"\ntest_that('method.A (CVwR, EL, 90% CI, PE) of rds02', {",**

**"\n x <- method.A(details=TRUE, print=FALSE, data=rds02)",**

**"\n expect_equivalent(as.numeric(x[, c(12, 15:19)]), tolerance=5e-7,",**

**"\n expected=c(11.17076, 80, 125,",**

**"\n 97.31555, 107.4649, 102.2644))})",**

**"\ntest_that('method.A (CVwR, EL, 90% CI, PE) of rds03', {",**

**"\n x <- method.A(details=TRUE, print=FALSE, data=rds03)",**

**"\n expect_equivalent(as.numeric(x[, c(12, 15:19)]), tolerance=5e-7,",**

**"\n expected=c(58.34494, 69.83678, 143.191,",**

**"\n 113.0492, 136.4254, 124.1885))})",**

**"\ntest_that('method.A (CVwR, EL, 90% CI, PE) of rds04', {",**

**"\n x <- method.A(details=TRUE, print=FALSE, data=rds04)",**

**"\n expect_equivalent(as.numeric(x[, c(12, 15:19)]), tolerance=5e-7,",**

**"\n expected=c(61.21664, 69.83678, 143.191,",**

**"\n 117.9016, 159.6893, 137.2138))})",**

**"\ntest_that('method.A (CVwR, EL, 90% CI, PE) of rds05', {",**

**"\n x <- method.A(details=TRUE, print=FALSE, data=rds05)",**

**"\n expect_equivalent(as.numeric(x[, c(12, 15:19)]), tolerance=5e-7,",**

**"\n expected=c(11.92193, 80, 125,",**

**"\n 103.8242, 112.0357, 107.8518))})",**

**"\ntest_that('method.A (CVwR, EL, 90% CI, PE) of rds06', {",**

**"\n x <- method.A(details=TRUE, print=FALSE, data=rds06)",**

**"\n expect_equivalent(as.numeric(x[, c(12, 15:19)]), tolerance=5e-7,",**

**"\n expected=c(35.15709, 77.14772, 129.6215,",**

**"\n 80.06738, 93.36574, 86.46127))})",**

**"\ntest_that('method.A (CVwR, EL, 90% CI, PE) of rds07', {",**

**"\n x <- method.A(details=TRUE, print=FALSE, data=rds07)",**

**"\n expect_equivalent(as.numeric(x[, c(12, 15:19)]), tolerance=5e-7,",**

**"\n expected=c(34.18815, 77.67137, 128.7476,",**

**"\n 86.45598, 92.81029, 89.57681))})",**

**"\ntest_that('method.A (CVwR, EL, 90% CI, PE) of rds08', {",**

**"\n x <- method.A(details=TRUE, print=FALSE, data=rds08)",**

**"\n expect_equivalent(as.numeric(x[, c(12, 15:19)]), tolerance=5e-7,",**

**"\n expected=c(77.61894, 69.83678, 143.191,",**

**"\n 75.69153, 87.59971, 81.42823))})",**

**"\ntest_that('method.A (CVwR, EL, 90% CI, PE) of rds09', {",**

**"\n x <- method.A(details=TRUE, print=FALSE, data=rds09)",**

**"\n expect_equivalent(as.numeric(x[, c(12, 15:19)]), tolerance=5e-7,",**

**"\n expected=c(77.61894, 69.83678, 143.191,",**

**"\n 75.69153, 87.59971, 81.42823))})",**

**"\ntest_that('method.A (CVwR, EL, 90% CI, PE) of rds10', {",**

**"\n x <- method.A(details=TRUE, print=FALSE, data=rds10)",**

**"\n expect_equivalent(as.numeric(x[, c(12, 15:19)]), tolerance=5e-7,",**

**"\n expected=c(9.506099, 80, 125,",**

**"\n 96.26997, 107.5861, 101.7709))})",**

**"\ntest_that('method.A (CVwR, EL, 90% CI, PE) of rds11', {",**

**"\n x <- method.A(details=TRUE, print=FALSE, data=rds11)",**

**"\n expect_equivalent(as.numeric(x[, c(12, 15:19)]), tolerance=5e-7,",**

**"\n expected=c(36.23019, 76.57463, 130.5916,",**

**"\n 80.63656, 100.3801, 89.96836))})",**

**"\ntest_that('method.A (CVwR, EL, 90% CI, PE) of rds12', {",**

**"\n x <- method.A(details=TRUE, print=FALSE, data=rds12)",**

**"\n expect_equivalent(as.numeric(x[, c(12, 15:19)]), tolerance=5e-7,",**

**"\n expected=c(221.5472, 69.83678, 143.191,",**

**"\n 90.82107, 158.9575, 120.1528))})",**

**"\ntest_that('method.A (CVwR, EL, 90% CI, PE) of rds13', {",**

**"\n x <- method.A(details=TRUE, print=FALSE, data=rds13)",**

**"\n expect_equivalent(as.numeric(x[, c(12, 15:19)]), tolerance=5e-7,",**

**"\n expected=c(79.58209, 69.83678, 143.191,",**

**"\n 72.71128, 85.35728, 78.78094))})",**

**"\ntest_that('method.A (CVwR, EL, 90% CI, PE) of rds14', {",**

**"\n x <- method.A(details=TRUE, print=FALSE, data=rds14)",**

**"\n expect_equivalent(as.numeric(x[, c(12, 15:19)]), tolerance=5e-7,",**

**"\n expected=c(125.9951, 69.83678, 143.191,",**

**"\n 69.98855, 123.1679, 92.84581))})",**

**"\ntest_that('method.A (CVwR, EL, 90% CI, PE) of rds15', {",**

**"\n x <- method.A(details=TRUE, print=FALSE, data=rds15)",**

**"\n expect_equivalent(as.numeric(x[, c(12, 15:19)]), tolerance=5e-7,",**

**"\n expected=c(79.58209, 69.83678, 143.191,",**

**"\n 72.71128, 85.35728, 78.78094))})",**

**"\ntest_that('method.A (CVwR, EL, 90% CI, PE) of rds16', {",**

**"\n x <- method.A(details=TRUE, print=FALSE, data=rds16)",**

**"\n expect_equivalent(as.numeric(x[, c(12, 15:19)]), tolerance=5e-7,",**

**"\n expected=c(49.71545, 69.96489, 142.9288,",**

**"\n 69.53983, 89.36796, 78.83294))})",**

**"\ntest_that('method.A (CVwR, EL, 90% CI, PE) of rds17', {",**

**"\n x <- method.A(details=TRUE, print=FALSE, data=rds17)",**

**"\n expect_equivalent(as.numeric(x[, c(12, 15:19)]), tolerance=5e-7,",**

**"\n expected=c(30.38521, 79.7839, 125.3386,",**

**"\n 116.0171, 155.1944, 134.1835))})",**

**"\ntest_that('method.A (CVwR, EL, 90% CI, PE) of rds18', {",**

**"\n x <- method.A(details=TRUE, print=FALSE, data=rds18)",**

**"\n expect_equivalent(as.numeric(x[, c(12, 15:19)]), tolerance=5e-7,",**

**"\n expected=c(125.9951, 69.83678, 143.191,",**

**"\n 54.15838, 99.45727, 73.3924))})",**

**"\ntest_that('method.A (CVwR, EL, 90% CI, PE) of rds19', {",**

**"\n x <- method.A(details=TRUE, print=FALSE, data=rds19)",**

**"\n expect_equivalent(as.numeric(x[, c(12, 15:19)]), tolerance=5e-7,",**

**"\n expected=c(115.231, 69.83678, 143.191,",**

**"\n 54.17604, 100.0003, 73.60448))})",**

**"\ntest_that('method.A (CVwR, EL, 90% CI, PE) of rds20', {",**

**"\n x <- method.A(details=TRUE, print=FALSE, data=rds20)",**

**"\n expect_equivalent(as.numeric(x[, c(12, 15:19)]), tolerance=5e-7,",**

**"\n expected=c(135.9316, 69.83678, 143.191,",**

**"\n 51.17198, 96.74928, 70.36229))})",**

**"\ntest_that('method.A (CVwR, EL, 90% CI, PE) of rds21', {",**

**"\n x <- method.A(details=TRUE, print=FALSE, data=rds21)",**

**"\n expect_equivalent(as.numeric(x[, c(12, 15:19)]), tolerance=5e-7,",**

**"\n expected=c(32.16196, 78.7855, 126.9269,",**

**"\n 111.7245, 127.7421, 119.4652))})",**

**"\ntest_that('method.A (CVwR, EL, 90% CI, PE) of rds22', {",**

**"\n x <- method.A(details=TRUE, print=FALSE, data=rds22)",**

**"\n expect_equivalent(as.numeric(x[, c(12, 15:19)]), tolerance=5e-7,",**

**"\n expected=c(45.28325, 72.01939, 138.8515,",**

**"\n 77.98481, 106.0858, 90.95646))})",**

**"\ntest_that('method.A (CVwR, EL, 90% CI, PE) of rds23', {",**

**"\n x <- method.A(details=TRUE, print=FALSE, data=rds23)",**

**"\n expect_equivalent(as.numeric(x[, c(12, 15:19)]), tolerance=5e-7,",**

**"\n expected=c(49.60714, 70.01378, 142.829,",**

**"\n 97.12989, 128.4137, 111.6817))})",**

**"\ntest_that('method.A (CVwR, EL, 90% CI, PE) of rds24', {",**

**"\n x <- method.A(details=TRUE, print=FALSE, data=rds24)",**

**"\n expect_equivalent(as.numeric(x[, c(12, 15:19)]), tolerance=5e-7,",**

**"\n expected=c(54.24018, 69.83678, 143.191,",**

**"\n 87.23787, 109.8533, 97.89466))})",**

**"\ntest_that('method.A (CVwR, EL, 90% CI, PE) of rds25', {",**

**"\n x <- method.A(details=TRUE, print=FALSE, data=rds25)",**

**"\n expect_equivalent(as.numeric(x[, c(12, 15:19)]), tolerance=5e-7,",**

**"\n expected=c(82.80518, 69.83678, 143.191,",**

**"\n 77.92805, 98.10162, 87.43493))})",**

**"\ntest_that('method.A (CVwR, EL, 90% CI, PE) of rds26', {",**

**"\n x <- method.A(details=TRUE, print=FALSE, data=rds26)",**

**"\n expect_equivalent(as.numeric(x[, c(12, 15:19)]), tolerance=5e-7,",**

**"\n expected=c(60.25584, 69.83678, 143.191,",**

**"\n 133.5157, 171.4202, 151.2854))})",**

**"\ntest_that('method.A (CVwR, EL, 90% CI, PE) of rds27', {",**

**"\n x <- method.A(details=TRUE, print=FALSE, data=rds27)",**

**"\n expect_equivalent(as.numeric(x[, c(12, 15:19)]), tolerance=5e-7,",**

**"\n expected=c(35.76263, 76.82345, 130.1686,",**

**"\n 78.64846, 89.05791, 83.69151))})",**

**"\ntest_that('method.A (CVwR, EL, 90% CI, PE) of rds28', {",**

**"\n x <- method.A(details=TRUE, print=FALSE, data=rds28)",**

**"\n expect_equivalent(as.numeric(x[, c(12, 15:19)]), tolerance=5e-7,",**

**"\n expected=c(28.74524, 80, 125,",**

**"\n 87.86358, 100.0704, 93.76858))})",**

**"\ntest_that('method.A (CVwR, EL, 90% CI, PE) of rds29', {",**

**"\n x <- method.A(details=TRUE, print=FALSE, data=rds29)",**

**"\n expect_equivalent(as.numeric(x[, c(12, 15:19)]), tolerance=5e-7,",**

**"\n expected=c(20.1358, 80, 125,",**

**"\n 88.28064, 121.3064, 103.4843))})",**

**"\ntest_that('method.A (CVwR, EL, 90% CI, PE) of rds30', {",**

**"\n x <- method.A(details=TRUE, print=FALSE, data=rds30)",**

**"\n expect_equivalent(as.numeric(x[, c(12, 15:19)]), tolerance=5e-7,",**

**"\n expected=c(25.2277, 80, 125,",**

**"\n 79.60345, 108.0298, 92.73371))})",**

**"\n###################",**

**"\n# ABEL (Method B) #",**

**"\n###################",**

**"\ntest_that('method.B (CVwR, EL, 90% CI, PE) of rds01', {",**

**"\n x <- method.B(details=TRUE, print=FALSE, data=rds01)",**

**"\n expect_equivalent(as.numeric(x[, c(12, 15:19)]), tolerance=5e-7,",**

**"\n expected=c(46.96431, 71.22698, 140.3962,",**

**"\n 107.1707, 124.9725, 115.7298))})",**

**"\ntest_that('method.B (CVwR, EL, 90% CI, PE) of rds02', {",**

**"\n x <- method.B(details=TRUE, print=FALSE, data=rds02)",**

**"\n expect_equivalent(as.numeric(x[, c(12, 15:19)]), tolerance=5e-7,",**

**"\n expected=c(11.17076, 80, 125,",**

**"\n 97.31555, 107.4649, 102.2644))})",**

**"\ntest_that('method.B (CVwR, EL, 90% CI, PE) of rds03', {",**

**"\n x <- method.B(details=TRUE, print=FALSE, data=rds03)",**

**"\n expect_equivalent(as.numeric(x[, c(12, 15:19)]), tolerance=5e-7,",**

**"\n expected=c(58.34494, 69.83678, 143.191,",**

**"\n 113.3136, 136.7324, 124.4734))})",**

**"\ntest_that('method.B (CVwR, EL, 90% CI, PE) of rds04', {",**

**"\n x <- method.B(details=TRUE, print=FALSE, data=rds04)",**

**"\n expect_equivalent(as.numeric(x[, c(12, 15:19)]), tolerance=5e-7,",**

**"\n expected=c(61.21664, 69.83678, 143.191,",**

**"\n 117.9016, 159.6893, 137.2138))})",**

**"\ntest_that('method.B (CVwR, EL, 90% CI, PE) of rds05', {",**

**"\n x <- method.B(details=TRUE, print=FALSE, data=rds05)",**

**"\n expect_equivalent(as.numeric(x[, c(12, 15:19)]), tolerance=5e-7,",**

**"\n expected=c(11.92193, 80, 125,",**

**"\n 103.8242, 112.0357, 107.8518))})",**

**"\ntest_that('method.B (CVwR, EL, 90% CI, PE) of rds06', {",**

**"\n x <- method.B(details=TRUE, print=FALSE, data=rds06)",**

**"\n expect_equivalent(as.numeric(x[, c(12, 15:19)]), tolerance=5e-7,",**

**"\n expected=c(35.15709, 77.14772, 129.6215,",**

**"\n 80.01762, 93.30905, 86.40815))})",**

**"\ntest_that('method.B (CVwR, EL, 90% CI, PE) of rds07', {",**

**"\n x <- method.B(details=TRUE, print=FALSE, data=rds07)",**

**"\n expect_equivalent(as.numeric(x[, c(12, 15:19)]), tolerance=5e-7,",**

**"\n expected=c(34.18815, 77.67137, 128.7476,",**

**"\n 86.45598, 92.81029, 89.57681))})",**

**"\ntest_that('method.B (CVwR, EL, 90% CI, PE) of rds08', {",**

**"\n x <- method.B(details=TRUE, print=FALSE, data=rds08)",**

**"\n expect_equivalent(as.numeric(x[, c(12, 15:19)]), tolerance=5e-7,",**

**"\n expected=c(77.61894, 69.83678, 143.191,",**

**"\n 75.69153, 87.59971, 81.42823))})",**

**"\ntest_that('method.B (CVwR, EL, 90% CI, PE) of rds09', {",**

**"\n x <- method.B(details=TRUE, print=FALSE, data=rds09)",**

**"\n expect_equivalent(as.numeric(x[, c(12, 15:19)]), tolerance=5e-7,",**

**"\n expected=c(77.61894, 69.83678, 143.191,",**

**"\n 75.69153, 87.59971, 81.42823))})",**

**"\ntest_that('method.B (CVwR, EL, 90% CI, PE) of rds10', {",**

**"\n x <- method.B(details=TRUE, print=FALSE, data=rds10)",**

**"\n expect_equivalent(as.numeric(x[, c(12, 15:19)]), tolerance=5e-7,",**

**"\n expected=c(9.506099, 80, 125,",**

**"\n 96.26997, 107.5861, 101.7709))})",**

**"\ntest_that('method.B (CVwR, EL, 90% CI, PE) of rds11', {",**

**"\n x <- method.B(details=TRUE, print=FALSE, data=rds11)",**

**"\n expect_equivalent(as.numeric(x[, c(12, 15:19)]), tolerance=5e-7,",**

**"\n expected=c(36.23019, 76.57463, 130.5916,",**

**"\n 80.63656, 100.3801, 89.96836))})",**

**"\ntest_that('method.B (CVwR, EL, 90% CI, PE) of rds12', {",**

**"\n x <- method.B(details=TRUE, print=FALSE, data=rds12)",**

**"\n expect_equivalent(as.numeric(x[, c(12, 15:19)]), tolerance=5e-7,",**

**"\n expected=c(221.5472, 69.83678, 143.191,",**

**"\n 90.34419, 157.8835, 119.4314))})",**

**"\ntest_that('method.B (CVwR, EL, 90% CI, PE) of rds13', {",**

**"\n x <- method.B(details=TRUE, print=FALSE, data=rds13)",**

**"\n expect_equivalent(as.numeric(x[, c(12, 15:19)]), tolerance=5e-7,",**

**"\n expected=c(79.58209, 69.83678, 143.191,",**

**"\n 72.86789, 85.51224, 78.9373))})",**

**"\ntest_that('method.B (CVwR, EL, 90% CI, PE) of rds14', {",**

**"\n x <- method.B(details=TRUE, print=FALSE, data=rds14)",**

**"\n expect_equivalent(as.numeric(x[, c(12, 15:19)]), tolerance=5e-7,",**

**"\n expected=c(125.9951, 69.83678, 143.191,",**

**"\n 69.21029, 121.2766, 91.61655))})",**

**"\ntest_that('method.B (CVwR, EL, 90% CI, PE) of rds15', {",**

**"\n x <- method.B(details=TRUE, print=FALSE, data=rds15)",**

**"\n expect_equivalent(as.numeric(x[, c(12, 15:19)]), tolerance=5e-7,",**

**"\n expected=c(79.58209, 69.83678, 143.191,",**

**"\n 72.86789, 85.51224, 78.9373))})",**

**"\ntest_that('method.B (CVwR, EL, 90% CI, PE) of rds16', {",**

**"\n x <- method.B(details=TRUE, print=FALSE, data=rds16)",**

**"\n expect_equivalent(as.numeric(x[, c(12, 15:19)]), tolerance=5e-7,",**

**"\n expected=c(49.71545, 69.96489, 142.9288,",**

**"\n 69.53983, 89.36796, 78.83294))})",**

**"\ntest_that('method.B (CVwR, EL, 90% CI, PE) of rds17', {",**

**"\n x <- method.B(details=TRUE, print=FALSE, data=rds17)",**

**"\n expect_equivalent(as.numeric(x[, c(12, 15:19)]), tolerance=5e-7,",**

**"\n expected=c(30.38521, 79.7839, 125.3386,",**

**"\n 115.9678, 155.0942, 134.1116))})",**

**"\ntest_that('method.B (CVwR, EL, 90% CI, PE) of rds18', {",**

**"\n x <- method.B(details=TRUE, print=FALSE, data=rds18)",**

**"\n expect_equivalent(as.numeric(x[, c(12, 15:19)]), tolerance=5e-7,",**

**"\n expected=c(125.9951, 69.83678, 143.191,",**

**"\n 59.12418, 107.2187, 79.61922))})",**

**"\ntest_that('method.B (CVwR, EL, 90% CI, PE) of rds19', {",**

**"\n x <- method.B(details=TRUE, print=FALSE, data=rds19)",**

**"\n expect_equivalent(as.numeric(x[, c(12, 15:19)]), tolerance=5e-7,",**

**"\n expected=c(115.231, 69.83678, 143.191,",**

**"\n 53.84191, 98.77551, 72.92641))})",**

**"\ntest_that('method.B (CVwR, EL, 90% CI, PE) of rds20', {",**

**"\n x <- method.B(details=TRUE, print=FALSE, data=rds20)",**

**"\n expect_equivalent(as.numeric(x[, c(12, 15:19)]), tolerance=5e-7,",**

**"\n expected=c(135.9316, 69.83678, 143.191,",**

**"\n 50.918, 95.62665, 69.77906))})",**

**"\ntest_that('method.B (CVwR, EL, 90% CI, PE) of rds21', {",**

**"\n x <- method.B(details=TRUE, print=FALSE, data=rds21)",**

**"\n expect_equivalent(as.numeric(x[, c(12, 15:19)]), tolerance=5e-7,",**

**"\n expected=c(32.16196, 78.7855, 126.9269,",**

**"\n 111.7166, 127.7332, 119.4568))})",**

**"\ntest_that('method.B (CVwR, EL, 90% CI, PE) of rds22', {",**

**"\n x <- method.B(details=TRUE, print=FALSE, data=rds22)",**

**"\n expect_equivalent(as.numeric(x[, c(12, 15:19)]), tolerance=5e-7,",**

**"\n expected=c(45.28325, 72.01939, 138.8515,",**

**"\n 77.98481, 106.0858, 90.95646))})",**

**"\ntest_that('method.B (CVwR, EL, 90% CI, PE) of rds23', {",**

**"\n x <- method.B(details=TRUE, print=FALSE, data=rds23)",**

**"\n expect_equivalent(as.numeric(x[, c(12, 15:19)]), tolerance=5e-7,",**

**"\n expected=c(49.60714, 70.01378, 142.829,",**

**"\n 97.12989, 128.4137, 111.6817))})",**

**"\ntest_that('method.B (CVwR, EL, 90% CI, PE) of rds24', {",**

**"\n x <- method.B(details=TRUE, print=FALSE, data=rds24)",**

**"\n expect_equivalent(as.numeric(x[, c(12, 15:19)]), tolerance=5e-7,",**

**"\n expected=c(54.24018, 69.83678, 143.191,",**

**"\n 87.23787, 109.8533, 97.89466))})",**

**"\ntest_that('method.B (CVwR, EL, 90% CI, PE) of rds25', {",**

**"\n x <- method.B(details=TRUE, print=FALSE, data=rds25)",**

**"\n expect_equivalent(as.numeric(x[, c(12, 15:19)]), tolerance=5e-7,",**

**"\n expected=c(82.80518, 69.83678, 143.191,",**

**"\n 77.92805, 98.10162, 87.43493))})",**

**"\ntest_that('method.B (CVwR, EL, 90% CI, PE) of rds26', {",**

**"\n x <- method.B(details=TRUE, print=FALSE, data=rds26)",**

**"\n expect_equivalent(as.numeric(x[, c(12, 15:19)]), tolerance=5e-7,",**

**"\n expected=c(60.25584, 69.83678, 143.191,",**

**"\n 133.5121, 171.4248, 151.2854))})",**

**"\ntest_that('method.B (CVwR, EL, 90% CI, PE) of rds27', {",**

**"\n x <- method.B(details=TRUE, print=FALSE, data=rds27)",**

**"\n expect_equivalent(as.numeric(x[, c(12, 15:19)]), tolerance=5e-7,",**

**"\n expected=c(35.76263, 76.82345, 130.1686,",**

**"\n 78.85772, 89.3044, 83.91866))})",**

**"\ntest_that('method.B (CVwR, EL, 90% CI, PE) of rds28', {",**

**"\n x <- method.B(details=TRUE, print=FALSE, data=rds28)",**

**"\n expect_equivalent(as.numeric(x[, c(12, 15:19)]), tolerance=5e-7,",**

**"\n expected=c(28.74524, 80, 125,",**

**"\n 87.86358, 100.0704, 93.76858))})",**

**"\ntest_that('method.B (CVwR, EL, 90% CI, PE) of rds29', {",**

**"\n x <- method.B(details=TRUE, print=FALSE, data=rds29)",**

**"\n expect_equivalent(as.numeric(x[, c(12, 15:19)]), tolerance=5e-7,",**

**"\n expected=c(20.1358, 80, 125,",**

**"\n 88.43538, 121.5846, 103.6937))})",**

**"\ntest_that('method.B (CVwR, EL, 90% CI, PE) of rds30', {",**

**"\n x <- method.B(details=TRUE, print=FALSE, data=rds30)",**

**"\n expect_equivalent(as.numeric(x[, c(12, 15:19)]), tolerance=5e-7,",**

**"\n expected=c(25.2277, 80, 125,",**

**"\n 79.58054, 108.0608, 92.73371))})",**

**"\ntest_that('method.B (Satterthwaite DF, CVwR, EL, 90% CI, PE) of rds29', {",**

**"\n x <- method.B(details=TRUE, print=FALSE, data=rds29, option=1)",**

**"\n expect_equivalent(as.numeric(x[, c(10, 12, 15:19)]), tolerance=5e-7,",**

**"\n expected=c(24.86467, 20.1358, 80, 125,",**

**"\n 88.43243, 121.5886, 103.6937))})",**

**"\ntest_that('method.B (Satterthwaite DF, CVwR, EL, 90% CI, PE) of rds30', {",**

**"\n x <- method.B(details=TRUE, print=FALSE, data=rds30, option=1)",**

**"\n expect_equivalent(as.numeric(x[, c(10, 12, 15:19)]), tolerance=5e-7,",**

**"\n expected=c(17.86418, 25.2277, 80, 125,",**

**"\n 79.57553, 108.0676, 92.73371))})",**

**"\nif (packageVersion('replicateBE') >= '1.0.8.9000')",**

**"\n test_that('method.B (Kenward-Roger DF, CVwR, EL, 90% CI, PE) of rds29', {",**

**"\n x <- method.B(details=TRUE, print=FALSE, data=rds29, option=3)",**

**"\n expect_equivalent(as.numeric(x[, c(10, 12, 15:19)]), tolerance=5e-7,",**

**"\n expected=c(25.15961, 20.1358, 80, 125,",**

**"\n 88.42778, 121.595, 103.6937))})",**

**"\nif (packageVersion('replicateBE') >= '1.0.8.9000')",**

**"\n test_that('method.B (Kenward-Roger DF, CVwR, EL, 90% CI, PE) of rds30', {",**

**"\n x <- method.B(details=TRUE, print=FALSE, data=rds30, option=3)",**

**"\n expect_equivalent(as.numeric(x[, c(10, 12, 15:19)]), tolerance=5e-7,",**

**"\n expected=c(18.00203, 25.2277, 80, 125,",**

**"\n 79.58062, 108.0607, 92.73371))})",**

**"\n")**

**##################**

**# Create folders #**

**##################**

**basedir <- basename(tempdir())**

**testloc <- file.path(basedir, 'testthat')**

**dir.create(testloc, recursive=TRUE)**

**if (!dir.exists(testloc)) stop(paste0('The directory "', testloc, '" was not created.'))**

**delete.test <- function(basedir) { # Delete code/folders at the end**

**f <- list.files(basedir, include.dirs=FALSE, full.names=TRUE, recursive=TRUE)**

**invisible(file.remove(f))**

**unlink(basedir, recursive=TRUE)**

**if (dir.exists(basedir)) {**

**warning(paste0('The directory "', file.path(getwd(), basedir), '" was not deleted.'))**

**}**

**}**

**##########################**

**# Source of 'runtests.R' #**

**##########################**

**source.2 <- paste0(**

**"###########################",**

**"\n# Master script for tests #",**

**"\n###########################",**

**"\n# Check/install packages #",**

**"\n###########################",**

**"\nlist.of.packages <- list('testthat', 'replicateBE')",**

**"\nnotloaded <- withCallingHandlers(list.of.packages[!unlist(lapply(list.of.packages, require, character.only=TRUE))]," ,**

**"\n warning = function(w) {invokeRestart('muffleWarning')}, ",**

**"\n message = function(m) {invokeRestart('muffleMessage')}) ",**

**"\nif(length(notloaded) > 0) {",**

**"\n stop(paste0('\\nPlease install the following package(s) in R:\\n', paste0(' ', notloaded, collapse='\\n'), '\\nbefore execution.\\n'), call.=FALSE)",**

**"\n} else {",**

**"\n msg <- '\\n90 tests performed: ABE(), method.A(), method.B() on each of the 30 datasets.'",**

**"\n add.tests <- 1+sum(packageVersion('replicateBE') >= '1.0.8.9000')",**

**"\n if (add.tests == 1) {",**

**"\n tests <- 'test'",**

**"\n } else {",**

**"\n tests <- 'four tests'",**

**"\n }",**

**"\n msg <- paste0(msg, '\\nAdditional ', tests, ': Degrees of freedom approximated for incomplete data.')",**

**"\n msg <- paste0(msg, '\\n method.B(option = 1) tested on rds29 and rds30 (Satterthwaite).')",**

**"\n if (packageVersion('replicateBE') >= '1.0.8.9000') {",**

**"\n msg <- paste0(msg, '\\n method.B(option = 3) tested on rds29 and rds30 (Kenward-Roger).')",**

**"\n }",**

**"\n msg <- paste0(msg, '\\nok: Local results differ less than 0.0000005 (i.e., beyond the 7th signi?cant')",**

**"\n msg <- paste0(msg, '\\n digit) from CRAN\u2019s installations on all operating systems (32 and 64 bit):')",**

**"\n msg <- paste0(msg, '\\n See https://cran.r-project.org/web/checks/check_?avors.html.')",**

**"\n msg <- paste0(msg, '\\nDetails at https://cran.r-project.org/web/checks/check_results_replicateBE.html')",**

**"\n msg <- paste0(msg, '\\nIf all tests are ok, the package passed Installation Quali?cation (IQ).')",**

**"\n st <- proc.time()[[3]]",**

**"\n test_dir(path=testloc, reporter='tap')",**

**"\n cat(paste(msg, '\\n\\nTime for execution was', signif(proc.time()[[3]]-st, 3), 'seconds.\\n\\n'))",**

**"\n}\n")**

**cat(source.1, file = paste0(file.path(testloc, "testthat.R")))**

**cat(source.2, file = paste0(file.path(basedir, "runtests.R")))**

**# blank lines to get an 'empty' console...**

**###########################################**

**# Run tests on all 30 datasets: #**

**# ABE(), method.A(), method.B() #**

**# Additional tests on rds29 and rds30: #**

**# method.B(..., option=1) Satterthwaite #**

**# method.B(..., option=3) Kenward-Roger #**

**# On most machines execution should take #**

**# less than one minute. #**

**##########################################**

**source(paste0(file.path(basedir, "runtests.R")))**

**delete.test(basedir) # cleanup**

Expected output.

1..94

ok 1 ABE (90% CI, PE) of rds01

ok 2 ABE (90% CI, PE) of rds02

ok 3 ABE (90% CI, PE) of rds03

ok 4 ABE (90% CI, PE) of rds04

ok 5 ABE (90% CI, PE) of rds05

ok 6 ABE (90% CI, PE) of rds06

ok 7 ABE (90% CI, PE) of rds07

ok 8 ABE (90% CI, PE) of rds08

ok 9 ABE (90% CI, PE) of rds09

ok 10 ABE (90% CI, PE) of rds10

ok 11 ABE (90% CI, PE) of rds11

ok 12 ABE (90% CI, PE) of rds12

ok 13 ABE (90% CI, PE) of rds13

ok 14 ABE (90% CI, PE) of rds14

ok 15 ABE (90% CI, PE) of rds15

ok 16 ABE (90% CI, PE) of rds16

ok 17 ABE (90% CI, PE) of rds17

ok 18 ABE (90% CI, PE) of rds18

ok 19 ABE (90% CI, PE) of rds19

ok 20 ABE (90% CI, PE) of rds20

ok 21 ABE (90% CI, PE) of rds21

ok 22 ABE (90% CI, PE) of rds22

ok 23 ABE (90% CI, PE) of rds23

ok 24 ABE (90% CI, PE) of rds24

ok 25 ABE (90% CI, PE) of rds25

ok 26 ABE (90% CI, PE) of rds26

ok 27 ABE (90% CI, PE) of rds27

ok 28 ABE (90% CI, PE) of rds28

ok 29 ABE (90% CI, PE) of rds29

ok 30 ABE (90% CI, PE) of rds30

ok 31 method.A (CVwR, EL, 90% CI, PE) of rds01

ok 32 method.A (CVwR, EL, 90% CI, PE) of rds02

ok 33 method.A (CVwR, EL, 90% CI, PE) of rds03

ok 34 method.A (CVwR, EL, 90% CI, PE) of rds04

ok 35 method.A (CVwR, EL, 90% CI, PE) of rds05

ok 36 method.A (CVwR, EL, 90% CI, PE) of rds06

ok 37 method.A (CVwR, EL, 90% CI, PE) of rds07

ok 38 method.A (CVwR, EL, 90% CI, PE) of rds08

ok 39 method.A (CVwR, EL, 90% CI, PE) of rds09

ok 40 method.A (CVwR, EL, 90% CI, PE) of rds10

ok 41 method.A (CVwR, EL, 90% CI, PE) of rds11

ok 42 method.A (CVwR, EL, 90% CI, PE) of rds12

ok 43 method.A (CVwR, EL, 90% CI, PE) of rds13

ok 44 method.A (CVwR, EL, 90% CI, PE) of rds14

ok 45 method.A (CVwR, EL, 90% CI, PE) of rds15

ok 46 method.A (CVwR, EL, 90% CI, PE) of rds16

ok 47 method.A (CVwR, EL, 90% CI, PE) of rds17

ok 48 method.A (CVwR, EL, 90% CI, PE) of rds18

ok 49 method.A (CVwR, EL, 90% CI, PE) of rds19

ok 50 method.A (CVwR, EL, 90% CI, PE) of rds20

ok 51 method.A (CVwR, EL, 90% CI, PE) of rds21

ok 52 method.A (CVwR, EL, 90% CI, PE) of rds22

ok 53 method.A (CVwR, EL, 90% CI, PE) of rds23

ok 54 method.A (CVwR, EL, 90% CI, PE) of rds24

ok 55 method.A (CVwR, EL, 90% CI, PE) of rds25

ok 56 method.A (CVwR, EL, 90% CI, PE) of rds26

ok 57 method.A (CVwR, EL, 90% CI, PE) of rds27

ok 58 method.A (CVwR, EL, 90% CI, PE) of rds28

ok 59 method.A (CVwR, EL, 90% CI, PE) of rds29

ok 60 method.A (CVwR, EL, 90% CI, PE) of rds30

ok 61 method.B (CVwR, EL, 90% CI, PE) of rds01

ok 62 method.B (CVwR, EL, 90% CI, PE) of rds02

ok 63 method.B (CVwR, EL, 90% CI, PE) of rds03

ok 64 method.B (CVwR, EL, 90% CI, PE) of rds04

ok 65 method.B (CVwR, EL, 90% CI, PE) of rds05

ok 66 method.B (CVwR, EL, 90% CI, PE) of rds06

ok 67 method.B (CVwR, EL, 90% CI, PE) of rds07

ok 68 method.B (CVwR, EL, 90% CI, PE) of rds08

ok 69 method.B (CVwR, EL, 90% CI, PE) of rds09

ok 70 method.B (CVwR, EL, 90% CI, PE) of rds10

ok 71 method.B (CVwR, EL, 90% CI, PE) of rds11

ok 72 method.B (CVwR, EL, 90% CI, PE) of rds12

ok 73 method.B (CVwR, EL, 90% CI, PE) of rds13

ok 74 method.B (CVwR, EL, 90% CI, PE) of rds14

ok 75 method.B (CVwR, EL, 90% CI, PE) of rds15

ok 76 method.B (CVwR, EL, 90% CI, PE) of rds16

ok 77 method.B (CVwR, EL, 90% CI, PE) of rds17

ok 78 method.B (CVwR, EL, 90% CI, PE) of rds18

ok 79 method.B (CVwR, EL, 90% CI, PE) of rds19

ok 80 method.B (CVwR, EL, 90% CI, PE) of rds20

ok 81 method.B (CVwR, EL, 90% CI, PE) of rds21

ok 82 method.B (CVwR, EL, 90% CI, PE) of rds22

ok 83 method.B (CVwR, EL, 90% CI, PE) of rds23

ok 84 method.B (CVwR, EL, 90% CI, PE) of rds24

ok 85 method.B (CVwR, EL, 90% CI, PE) of rds25

ok 86 method.B (CVwR, EL, 90% CI, PE) of rds26

ok 87 method.B (CVwR, EL, 90% CI, PE) of rds27

ok 88 method.B (CVwR, EL, 90% CI, PE) of rds28

ok 89 method.B (CVwR, EL, 90% CI, PE) of rds29

ok 90 method.B (CVwR, EL, 90% CI, PE) of rds30

ok 91 method.B (Satterthwaite DF, CVwR, EL, 90% CI, PE) of rds29

ok 92 method.B (Satterthwaite DF, CVwR, EL, 90% CI, PE) of rds30

ok 93 method.B (Kenward-Roger DF, CVwR, EL, 90% CI, PE) of rds29

ok 94 method.B (Kenward-Roger DF, CVwR, EL, 90% CI, PE) of rds30

90 tests performed: ABE(), method.A(), method.B() on each of the 30 datasets.

Additional four tests: Degrees of freedom approximated for incomplete data.

method.B(option = 1) tested on rds29 and rds30 (Satterthwaite).

method.B(option = 3) tested on rds29 and rds30 (Kenward-Roger).

ok: Local results differ less than 0.0000005 (i.e., beyond the 7th signiﬁcant

digit) from CRAN’s installations on all operating systems (32 and 64 bit):

See https://cran.r-project.org/web/checks/check_ﬂavors.html.

Details at https://cran.r-project.org/web/checks/check_results_replicateBE.html

If all tests are ok, the package passed Installation Qualiﬁcation (IQ).

1. The name of the ﬁle depends on the installed version of replicateBE, *e.g.*, for 1.0.13 it will be
   replicateBE1-0-13_results.xlsx. [↑](#footnote-ref-1)
2. Evaluation of all reference datasets may take hours – even in v8.1 of Phoenix / WinNonlin. An alternative is to evaluate single datasets. In this case skip the step Append Worksheets and Sort by Source in all models. Instead, map one of the worksheets (rds01…rds30) directly. [↑](#footnote-ref-2)
